# Supplementary material for: Inclusion of Women in French Psychiatric Clinical Trials: A Qualitative Study of Researchers’ Experiences and Challenges
Source: Research Square preprint supplement (doi:10.21203/rs.3.rs-6718965/v1), 2025-06-29
Supplement: Supplementary file 1 [file c2228a8e37f05e9dcf1f2876.docx]

This interview guide aims to explore researchers’ perspectives on the inclusion of women in French psychiatric clinical trials.

**Profil :** Age, gender, academic degree, previous and current research experience.

**Brief rational of the study :** Since the thalidomide crisis, women have been historically underrepresented in clinical trials. Evidence from cardiology, infectious diseases, and oncology highlights the harmful consequences of this knowledge gap, which can lead to suboptimal treatment and health disparities. In psychiatry, some studies have begun to show differences in treatment response and clinical symptoms between men and women, suggesting that this underrepresentation may also impact mental health research.

**Generality :**

What is your overall perception of this issue?

Have you ever encountered clinical situations where gender influenced your decision-making? Could you share an example with me?

**Research experience :**

Could you explain how the inclusion of women is addressed in your research projects?

Was gender explicitly considered during the development of the study protocol?

**Research comitee :**

How would you describe your interactions with the research ethics committee?
